# Supplementary material
Source: Research Square preprint supplement (doi:10.21203/rs.3.rs-9109718/v1)
Supplement: Supplementary file 1 [file e528799b2bf7447a6121b20d.docx]

**Smoking status:**

**Your smoking status in the past year: [Single Choice]**

○ Never smoked

○ Occasionally smoked (less than 1 cigarette per day)

○ Currently smoking (more than 1 cigarette per day)

○ Formerly smoked (previously smoked more than 1 cigarette per day for over 1 year, now quit smoking)

**Drinking status:**

**Your drinking frequency in the past year: [Single Choice]**

○ Never drank

○ Once a month or less

○ 2-4 times a month

○ 2-3 times a week

○ 4 times a week or more

**Childhood experiences:**

**Did you feel happy during your childhood? [Single Choice]**

○ Very happy

○ Happy

○ Neutral

○ Unhappy

○ Very unhappy

**Job burnout:**

**Did you feel fatigued in the past year? [Single Choice]**

○ I enjoy my work. I have no symptoms of burnout

○ I am under stress, and don't always have as much energy as I did, but I don't feel burned out.

○ I am beginning to burn out and have one or more symptoms of burnout, e.g. emotional exhaustion

○ The symptoms of burnout that I am experiencing won't go away. I think about work frustrations a lot.

○ I feel completely burned out. I am at a point where I may need to seek help.

## Intimate Partner Violence (IPV)

**Frequency of physical violence you experienced from your partner in the past year: [Single Choice]**

○ None

○ 1 time

○ 2-3 times

○ More than 3 times

○Prefer not to answer

**Frequency of emotional violence you experienced from your partner in the past year: [Single Choice]**

○ None

○ 1 time

○ 2-3 times

○ More than 3 times

○Prefer not to answer

**Frequency of sexual violence you experienced from your partner in the past year: [Single Choice]**

○ None

○ 1 time

○ 2-3 times

○ More than 3 times

○Prefer not to answer

Table 1 Difference of characteristics between the included and excluded sample

| **Demographic variables** | **Included sample**  **(N=97867)** | **Excluded sample**  **(N=33846)** | **χ2** | ***P*** |
| --- | --- | --- | --- | --- |
| **Gender** |  |  | 456.01 | 0.001*** |
| Male | 6070 | 3269 |  |  |
| Female | 91797 | 30577 |  |  |
| **Age** |  |  | 14458.23 | 0.001*** |
| ≤30 | 25001 | 20831 |  |  |
| 31-40 | 53383 | 10129 |  |  |
| 41-50 | 15646 | 2258 |  |  |
| ≥51 | 3833 | 620 |  |  |
| Education |  |  | 49619.96 | 0.001*** |
| Below Bachelor's degree | 6292 | 20831 |  |  |
| Undergraduate | 87044 | 10129 |  |  |
| Postgraduate | 4521 | 2258 |  |  |
| **Partner’s occupation as a nurse** |  |  | 0.03 | 0.869 |
| No | 70325 | 5147 |  |  |
| Yes | 13297 | 979 |  |  |
| **Pregnancy** |  |  | 18.02 | 0.001*** |
| No | 88317 | 30400 |  |  |
| Yes | 348 | 177 |  |  |
| **Number of children** |  |  | 32426.91 | 0.001*** |
| 0 | 22650 | 26407 |  |  |
| 1 | 48878 | 5156 |  |  |
| ≥2 | 26339 | 2283 |  |  |
| **Smoking status** |  |  | 80.78 | 0.001*** |
| Never | 93733 | 32097 |  |  |
| now <1 cigarette /day | 2198 | 1054 |  |  |
| now >1 cigarette /day | 1561 | 572 |  |  |
| Used to | 375 | 123 |  |  |
| **Alcohol use status** |  |  | 7.88 | 0.096 |
| Never | 56102 | 19304 |  |  |
| 1 time/month or less | 35759 | 12320 |  |  |
| 2-4 times/month | 4844 | 1793 |  |  |
| 2-3 times/week | 756 | 279 |  |  |
| 4 times/week or more | 406 | 150 |  |  |
| **Childhood experience** |  |  | 43.09 | 0.001*** |
| Very good | 28463 | 9735 |  |  |
| Good | 39668 | 13369 |  |  |
| Normal | 25224 | 9293 |  |  |
| Bad | 3829 | 1205 |  |  |
| Very bad | 683 | 244 |  |  |

Notes: The excluded samples refer to those who were unwilling to answer the IPV-related questions.

*** indicated *P*<0.001
